# Supplementary material
Source: PubMed Central journal article supplement (PMC2700910)
Supplement: 0901249106_0901249106SI.pdf [file 0901249106_0901249106SI.pdf]

# Supporting Information

Woodward et al. 10.1073/pnas.0901249106

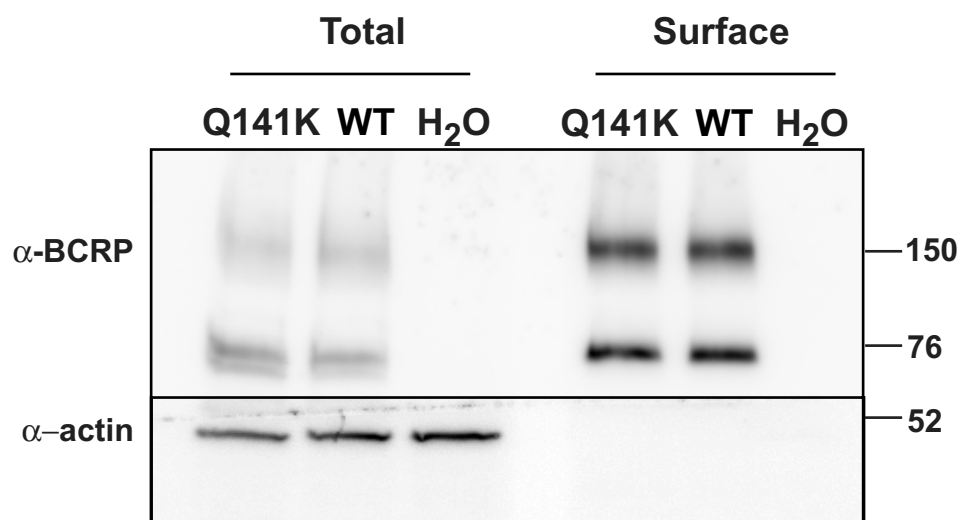

**Fig. S1.** Surface expression of wild type and mutant ABCG2 in *Xenopus* oocytes. Biotinylation experiments reveal that the protein amounts and surface expression of the Q141K mutant are similar to those of the wild-type ABCG2 transporter. Actin was used as a loading control. The blot is representative of results from oocytes taken from 2 different female frogs.

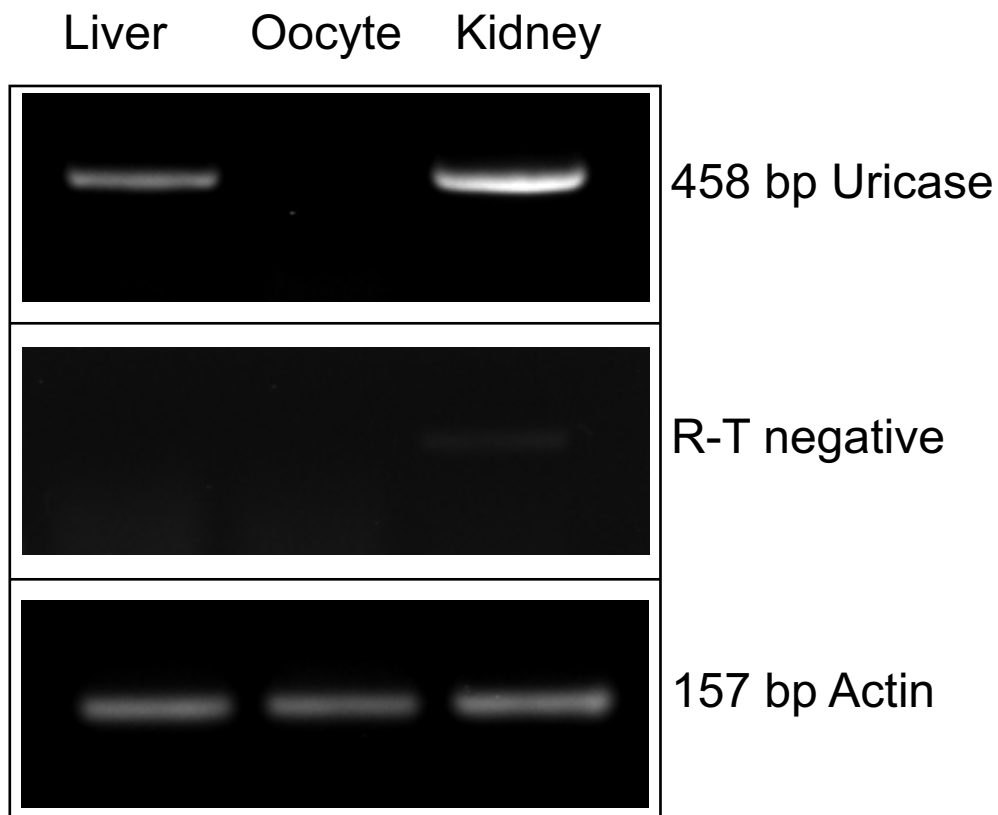

**Fig. S2.** Expression of *Xenopus laevis* uricase mRNA in female *Xenopus* tissues. (*Upper*) RT-PCR of RNA extracted from kidney, liver, and oocytes. The upper 458-bp bands show the uricase RT-PCR product. (*Middle*) No uricase PCR product was detected in reactions performed with inactivated reverse transcriptase. (*Lower*) The 157-bp actin RT-PCR product as a positive control. Tissues from 2 frogs produced the same results.
